# Supplementary material
Source: Springer Nature journal article supplement (https://www.springermedizin.de/resource/supplementary/12891_2013_2025_MOESM5_ESM.pdf/9510018)

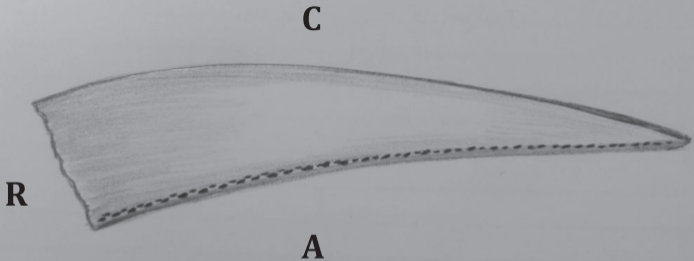

Supplement: MOESM5 [file 9510018]
